# Supplementary material for: Characterization of a new IN-I-PpoI fusion protein and a homology-arm containing transgene cassette that improve transgene expression persistence and 28S rRNA gene-targeted insertion of lentiviral vectors
Source: PLoS One. 2023 Jan 20;18(1):e0280894. doi: 10.1371/journal.pone.0280894 (PMC9858087; doi:10.1371/journal.pone.0280894)
Supplement: S1 Data — (XLSX) [file pone.0280894.s014.xlsx]

## Sheet: Fig1. LV titers
EGFP-LVs		p24 pg/ml			TU/ml				ZeoR-LVs		p24 pg/ml
LV name	n (LV lots)	Mean	Std. Deviation	Std. Error	Mean	Std. Deviation	Std. Error		LV name	n (LV lots)	Mean	Std. Deviation	Std. Error
D+H	11	144000000	67100000	20200000	70400000	45500000	13700000		D+H	2	121000000	19100000	13500000
D+H + HA	4	129000000	94500000	47200000	35100000	38600000	19300000		D+H + HA	1	175000000
D+N	6	96800000	67600000	27600000	131000000	142000000	58000000		D+N	2	104000000	52800000	37300000
D+N + HA	2	83100000	47900000	33900000	47000000	46700000	33100000		D+N + HA	1	169000000
D64V	5	113000000	95300000	42600000	496000000	1070000000	476000000		D64V	1	116000000
D64V + HA	2	148000000	89000000	62900000	6910000	1590000	1130000		D64V + HA	1	195000000
RH	5	88600000	41300000	18500000	10900000	7040000	3150000		RH	1	90400000
RH + HA	2	174000000	32500000	23000000	14100000	10300000	7290000		RH + HA	1	159000000
INwt	6	183000000	161000000	65700000	4110000000	4650000000	1900000000		INwt	2	124000000	28300000	20000000
INwt + HA	2	155000000	154000000	109000000	495000000	204000000	145000000		INwt + HA	1	181000000
LV name	p24 pg/ml	Titer FACS TU/ml	Average TU/ml
D+H - EGFP	116000000	48500000	7.03778e+07
	106000000	46300000
	65400000	70400000
	163000000	55170000
	251000000	177000000
	171000000	54100000
	270000000	71100000
	137000000	43100000
	99300000	21400000
	65800000	51200000
	141000000	135886300
D+H-ZeoR	134000000	na
	107000000
D+H+HA-EGFP	132000000	91000000	35055000
	31200000	2820000
	96200000	26700000
	256000000	19700000
D+H+HA-ZeoR	175000000	na
D+N-EGFP	35500000	31500000	1.30633e+08
	117000000	181000000
	62700000	61600000
	82500000	32700000
	223000000	398000000
	59800000	79000000
D+N-ZeoR	141000000	na
	66400000
D+N+HA-EGFP	49200000	13900000	46950000
	117000000	80000000
D+N+HA-ZeoR	169000000	na
D64V-EGFP	193000000	2400000000	495632000
	70300000	14500000
	66700000	9600000
	232000000	53800000
	4230000	260000
D64V-ZeoR	116000000	na
D64V+HA-EGFP	85200000	8030000	6905000
	211000000	5780000
D64V+HA-ZeoR	195000000	na
RH-EGFP	35200000	6200000	10860000
	115000000	18700000
	56600000	6200000
	134000000	18400000
	102000000	4800000
RH-ZeoR	90400000	na
RH+HA-EGFP	151000000	6830000	14115000
	197000000	21400000
RH+HA-ZeoR	159000000	na
INwt-EGFP	480000000	13000000000	4.11325e+09
	64900000	96900000
	183000000	3490000000
	107000000	4423613000
	40600000	7.89e+08
	220000000	2880000000
INwt-ZeoR	144000000	na
	104000000
INwt+HA-EGFP	264000000	639000000	494500000
	46800000	350000000
INwt+HA-ZeoR	181000000	na

## Sheet: Fig2. EGFP expression + persist
Flow cytometry analysis of EGFP expression: % EGFP-positive cells							Persistence of transgene expression: percentage of D2 transgene expression retained at later timepoints.
	D2	D6	D9	D13	D13 average			D2	D6	D9	D13	D13 average
INwt	0.9738	0.986733	0.980767	0.9884	0.981244		INwt	1	1.01328	1.00715	1.01499	0.998479
	0.9737	0.979433	0.983367	0.9848				1	1.00589	1.00993	1.0114
	0.9769	0.984933	0.983667	0.9885				1	1.00822	1.00693	1.01187
	0.992767	0.9955	0.990667	0.973267				1	1.00275	0.997885	0.980358
	0.994367	0.9918	0.989267	0.984567				1	0.997419	0.994871	0.990144
	0.994467	0.9803	0.986467	0.986267				1	0.985755	0.991955	0.991754
	0.9747	0.986567	0.9753	0.9693				1	1.01217	1.00062	0.99446
	0.9806	0.986467	0.9742	0.9717				1	1.00598	0.993473	0.990924
	0.984	0.987467	0.9778	0.9844				1	1.00352	0.993699	1.00041
D+H	0.2056	0.122333	0.0730667	0.0693	0.0977111		D+H	1	0.595006	0.355383	0.337062	0.245423
	0.2452	0.124433	0.0820667	0.0847				1	0.507477	0.334693	0.345432
	0.2528	0.130033	0.0817667	0.0757				1	0.514372	0.323444	0.299446
	0.635567	0.2855	0.148367	0.140767				1	0.449205	0.23344	0.221482
	0.570567	0.2769	0.166867	0.143567				1	0.485307	0.292458	0.251621
	0.597667	0.2929	0.162267	0.115467				1	0.490073	0.2715	0.193196
	0.483	0.162867	0.0949	0.0927				1	0.337198	0.19648	0.191925
	0.4217	0.143467	0.0934	0.0826				1	0.34021	0.221484	0.195874
	0.4318	0.145867	0.0833	0.0746				1	0.337811	0.192913	0.172765
D64V	0.0502	0.0198333	0	0.0023	0.00268889		D64V	1	0.395086	0	0.0458167	0.0133408
	0.04	0.0177333	0.00276667	0.0005				1	0.443333	0.0691667	0.0125
	0.0435	0.0196333	0.000766667	0.0007				1	0.451341	0.0176245	0.016092
	0.433067	0.0399	0.00416667	0.00746667				1	0.0921336	0.00962131	0.0172414
	0.443267	0.0516	0.00546667	0.00556667				1	0.116408	0.0123327	0.0125583
	0.490167	0.0601	0.00526667	0.00746667				1	0.122611	0.0107446	0.0152329
	0.3196	0.0524667	0	0.0002				1	0.164164	0	0.000625782
	0.2984	0.0461667	0.0018	0				1	0.154714	0.00603217	0
	0.258	0.0375667	0	0				1	0.145607	0	0
D+N	0.4021	0.323533	0.284067	0.2746	0.312122		D+N	1	0.804609	0.706458	0.682915	0.5957
	0.4408	0.355933	0.310067	0.2968				1	0.807471	0.703418	0.673321
	0.4783	0.380833	0.318067	0.3099				1	0.796223	0.664994	0.64792
	0.604567	0.392	0.333567	0.332967				1	0.648398	0.551745	0.550753
	0.645067	0.413	0.370567	0.343367				1	0.640244	0.574463	0.532296
	0.689967	0.4484	0.390567	0.374267				1	0.649886	0.566066	0.542442
	0.525	0.346867	0.2948	0.3094				1	0.660698	0.561524	0.589333
	0.4988	0.326367	0.2712	0.2865				1	0.654304	0.543705	0.574379
	0.4953	0.331067	0.2776	0.2813				1	0.668416	0.560468	0.567939
INwt+HR	0.8465	0.916333	0.880867	0.9003	0.952467		INwt+HR	1	1.0825	1.0406	1.06356	1.03107
	0.876	0.926633	0.904467	0.9124				1	1.0578	1.0325	1.04155
	0.8696	0.924033	0.908367	0.9126				1	1.0626	1.04458	1.04945
	0.963267	0.9942	0.986967	0.982467				1	1.03211	1.0246	1.01993
	0.977567	0.993	0.987567	0.978467				1	1.01579	1.01023	1.00092
	0.961667	0.9898	0.983067	0.972267				1	1.02925	1.02225	1.01102
	0.9573	0.981567	0.9751	0.9761				1	1.02535	1.01859	1.01964
	0.9311	0.976567	0.9689	0.9716				1	1.04883	1.0406	1.0435
	0.9378	0.972167	0.9616	0.966				1	1.03665	1.02538	1.03007
D64V+HR	0.0403	0.00463333	0	0	0.000188889		D64V+HR	1	0.114971	0	0	0.0011864
	0.0401	0.00773333	0	0				1	0.192851	0	0
	0.0466	0.00803333	0.000566667	0				1	0.172389	0.0121602	0
	0.161267	0.0169	0.00726667	0.000366667				1	0.104795	0.0450599	0.00227367
	0.179567	0.0189	0.00716667	0.000266667				1	0.105253	0.0399109	0.00148506
	0.154167	0.0136	0.00236667	0.00106667				1	0.0882162	0.0153514	0.00691892
	0.0632	0.00746667	0	0				1	0.118143	0	0
	0.0708	0.00936667	0	0				1	0.132298	0	0
	0.0656	0.00936667	0	0				1	0.142785	0	0
D+H+HR	0.117	0.0836333	0.0370667	0.025	0.0405222		D+H+HR	1	0.714815	0.316809	0.213675	0.193232
	0.1234	0.0802333	0.0288667	0.0336				1	0.650189	0.233928	0.272285
	0.1157	0.0785333	0.0315667	0.0264				1	0.678767	0.272832	0.228176
	0.238967	0.2564	0.0509667	0.0612667				1	1.07295	0.213279	0.256382
	0.361567	0.2782	0.0959667	0.0624667				1	0.769429	0.265419	0.172767
	0.341767	0.1494	0.106567	0.0991667				1	0.43714	0.311811	0.290159
	0.2051	0.0722667	0.0336	0.0211				1	0.352348	0.163823	0.102877
	0.1798	0.0419667	0.0183	0.0192				1	0.233407	0.10178	0.106785
	0.1719	0.0599667	0.0224	0.0165				1	0.348846	0.130308	0.095986
D+N+HR	0.1141	0.149833	0.126767	0.1269	0.143044		D+N+HR	1	1.31318	1.11101	1.11218	0.970461
	0.1101	0.152233	0.127167	0.1272				1	1.38268	1.15501	1.15531
	0.1126	0.154633	0.124267	0.1196				1	1.3733	1.10361	1.06217
	0.251767	0.2238	0.218467	0.204767				1	0.888918	0.867735	0.813319
	0.226967	0.2125	0.196567	0.197867				1	0.936261	0.86606	0.871787
	0.226667	0.2058	0.202267	0.211367				1	0.907941	0.892353	0.9325
	0.1085	0.100267	0.0927	0.0986				1	0.924117	0.854378	0.908756
	0.1051	0.100967	0.1034	0.0948				1	0.960672	0.983825	0.901998
	0.1089	0.113867	0.1028	0.1063				1	1.04561	0.943985	0.976125
R+H+HR	0.0619	0.0469333	0.0450667	0.0397	0.0425222		R+H+HR	1	0.758212	0.728056	0.641357	0.539012
	0.0777	0.0658333	0.0448667	0.0489				1	0.847276	0.577435	0.629344
	0.0633	0.0517333	0.0377667	0.0444				1	0.817272	0.59663	0.701422
	0.159967	0.0787	0.0718667	0.0700667				1	0.491977	0.44926	0.438008
	0.166867	0.0924	0.0800667	0.0692667				1	0.553736	0.479824	0.415102
	0.173367	0.0833	0.0739667	0.0644667				1	0.480485	0.426649	0.371852
	0.0252	0.0165667	0.0158	0.0157				1	0.657407	0.626984	0.623016
	0.0278	0.0185667	0.0139	0.0153				1	0.667866	0.5	0.55036
	0.031	0.0227667	0.0138	0.0149				1	0.734409	0.445161	0.480645
R+H	0.174	0.100733	0.0747667	0.072	0.0674556		R+H	1	0.578927	0.429693	0.413793	0.313329
	0.1559	0.0859333	0.0638667	0.0621				1	0.551208	0.409664	0.398332
	0.1617	0.102833	0.0743667	0.0683				1	0.635951	0.459905	0.422387
	0.294167	0.0905	0.0767667	0.0759667				1	0.307649	0.260963	0.258244
	0.325567	0.1099	0.0864667	0.0797667				1	0.337565	0.265588	0.245009
	0.339667	0.1142	0.0878667	0.0839667				1	0.336212	0.258685	0.247203
	0.2069	0.0818667	0.0523	0.0479				1	0.395682	0.252779	0.231513
	0.2006	0.0808667	0.0593	0.0631				1	0.403124	0.295613	0.314556
	0.1869	0.0799667	0.0472	0.054				1	0.427858	0.252541	0.288925

## Sheet: S3 Figure. T lymph growth rate
CELL NUMBER: LIVE CELLS/WELL							CELL NUMBER: LIVE CELLS/WELL
Zeocin-selected samples							No antibiotic selection
lot	LV	D1	D3	D6	D10		lot	LV	D1	D3	D6	D10
1163	INwt	145350	255600	611600	1980000		1163	INwt	145350	368400	547400	2035500
		101875	164700	600600	1102400				101875	216900	466000	949500
		138700	300000	758700	1680000				138700	349200	1440000	2938000
1148	INwt + HR	147250	265200	629200	2094000		1148	INwt + HR	147250	315600	676200	2129900
		121875	128700	600000	1014000				121875	202500	422000	877500
		146300	330000	729000	1673000				146300	354000	1337600	3055000
1165	D+N	146300	205200	312000	828000		1165	D+N	146300	348000	717600	2242000
		96875	54360	179100	455400				96875	196200	416000	955000
		138700	271200	600600	1.4465e+06				138700	344400	1302400	3042000
1151	D+N + HR	145350	157200	259050	844800		1151	D+N + HR	145350	394800	717600	2218400
		103750	37170	66150	279900				103750	228600	450000	990000
		156750	186000	554400	1192150				156750	381600	1385600	2717000
1164	D+H	138700	130800	62985	173850		1164	D+H	138700	112920	416500	1840800
		83125	34470	24390	150300				83125	210600	354000	845000
		124450	181200	312800	383600				124450	274800	979200	2158000
1150	D+H + HR	123500	96360	41895	168150		1150	D+H + HR	123500	220800	502250	1787700
		114375	27630	11880	108900				114375	203400	368000	820000
		124450	135600	240000	332750				124450	280800	1062400	2340000
1147	R+H	131100	153600	91320	291000		1147	R+H	131100	230400	612000	1817200
		75000	36180	12420	155700				75000	216000	438000	1005000
		166250	154800	315900	545200				166250	368400	1632000	3016000
1153	R+H + HR	226100	115320	77160	289000		1153	R+H + HR	226100	345600	382500	2094500
		87500	30060	16380	159300				87500	209700	430000	995000
		215650	133200	298350	493000				215650	352800	1523200	2834000
1073	D64V	164350	184800	147150	102060		1073	D64V	164350	355200	502350	1982400
		69375	81540	28800	31410				69375	236700	438000	940000
		120650	256800	559000	164640				120650	406800	1644800	2626000
1149	D64V + HR	165300	140400	83970	86515		1149	D64V + HR	165300	313200	724200	2129900
		65625	50760	7614	26010				65625	255600	434000	935000
		139650	170400	336000	98400				139650	426000	1340800	2522000
-	NTD	173850	248500	38805	7476.5		-	NTD	173850	399000	643500	2472100
		67500	49320	3771	981				67500	248400	462000	835000
		194750	211200	202300	50260				194750	463200	1625600	2691000

## Sheet: S4 Fig. VCN in karyotyping
S4 Figure. Vector copy number (VCN) measured from karyotyped cell samples.
	VCN	Average
NTD	0	0
	0
INwt	28.16	28.885
	29.61
INwt+HA	18.52	18.8
	19.08
RH	9.35	9.295
	9.24
D+H	72.77	70.945
	69.12
D+H+HA	89.86	96.35
	102.84

## Sheet: S5 Fig. MFI
Median FITC-A: GFP positive cells	Days post-transduction					GFP positive cells Events	Days post-transduction
Sample	D2	D6	D9	D13		Sample	D2	D6	D9	D13
INwt	403400	894482	914322	1.10438e+06		INwt	5124	10180	11597	2902
	582247	1063466	1042111	1.03701e+06			10066	3242	4190	12001
	535336	1.08795e+06	1.01222e+06	1.03319e+06			11031	7107	5846	12040
	153913	407301	419312	485527			12173	9903	9809	9728
	136620	423502	393391	473870			4745	9902	9798	9752
	132440	444885	405415	477686			12200	9912	9834	9879
	96219,8	314245	321012	426567			9772	9948	9847	9906
	82611,2	275842	292406	349780			9771	9875	9873	9870
	94348,8	297634	301759	349059			9803	9930	9876	9907
INwt+HA	192650	358697	359225	363912		INwt+HA	10508	12104	11536	11421
	178621	317435	326581	336167			13201	11900	11380	11443
	145249	323924	307035	311765			13149	11899	11614	11317
	70603.4	258882	260127	330088			11861	9853	9807	9796
	58196.7	250599	244552	303470			11422	9803	9745	9751
	54887.7	244576	260556	279487			11567	9759	9672	9695
	26309,6	105829	94670.1	113758			8499	9244	8848	9025
	30237,4	107319	100559	131428			8794	9347	9084	9146
	27979,2	105819	101966	124809			8730	9321	9123	9148
D+N	11436.7	32508	34684.2	36413.2		D+N	8166	4799	3879	4259
	12282.9	32022.3	38631.6	36782.4			8460	4958	4428	4351
	13026.5	33529.4	36068.1	35037			9301	5384	4463	4809
	11148	33398.5	38283.6	46274.3			6442	3506	3004	3129
	10746.6	35359.3	37839	45152			6240	3301	2768	2900
	10493.8	37885.1	40417.1	49793.3			6186	3348	2832	2848
	7741,1	23919.6	28345.2	35334.2			4055	3316	2880	2768
	8070,3	23905	26353.3	32485.5			4442	3640	3140	2990
	8424,1	24439.4	26869.2	34188.6			4817	3889	3220	3121
D+N + HA	9184.3	27841.8	29195.2	33313.1		D+N + HA	3265	2750	2596	2604
	8869.1	27390.1	29798.7	33659.3			2906	2622	2386	2556
	9152.3	28155.1	29730.1	34405.4			2814	2489	2453	2700
	8078	30088.8	30821.4	34938.1			1369	1040	983	1021
	7838.1	30782.6	31526.4	34417.8			1338	1214	1298	1228
	7900.8	30735.3	31250.8	34873.6			1391	1176	1084	1098
	6605,3	20525.7	21612.8	32774.8			1175	1579	1307	1291
	6907,1	19281.7	24690.2	34286.9			1361	1605	1311	1294
	6328,8	20402.6	22020.3	28663.6			1160	1627	1282	1218
RH	6870.7	25926.8	28583.8	28661.2		RH	3800	1100	973	999
	6619.7	24497.1	29530.7	29561.6			4349	1326	1091	1037
	6986.5	26435	26876	29545.7			4342	1393	1089	1091
	6110.8	27061.8	31920.5	39334			2671	856	579	514
	6107.9	25039.8	32198.9	41048			2560	846	649	666
	6005	27541.1	29339	38829.1			2429	837	528	575
	5491,5	17954.8	25099.6	39972.1			1774	1088	787	742
	5465,8	18606.4	24946	35889.4			1593	940	678	643
	5427,3	17713.6	22488.3	32622			1651	1109	783	705
RH + HA	7044.1	24105.6	24933.9	27293.7		RH + HA	2098	964	916	942
	6882.8	24929.1	24839.9	28468.8			2281	1121	1014	926
	6770.3	23663.1	25488.1	26740.5			2272	999	951	873
	6198.8	24498.3	23799.8	33864.1			370	203	214	192
	6378.9	26126.4	28744.6	33661.1			403	223	195	188
	5784.9	25419.4	29130.4	34035.9			436	265	194	184
	5534,9	17073.8	20111.4	29992.8			653	550	490	419
	5518,7	17919.3	22080.7	28576.9			811	739	488	511
	5549,8	20486.4	22030	26623.9			667	598	417	466
D+H	11296.2	23336.3	31600.7	35114.4		D+H	3070	2034	1105	1771
	12713.3	24518.1	33584.4	35873.1			7853	1732	886	1836
	12785.3	23497.2	27215.4	32055.8			8288	2736	699	1493
	11828.8	22012.3	29755.7	32073.9			5982	1666	1005	962
	11245.3	22566.9	31973.4	34154.2			5173	1472	990	861
	11490.7	20470.8	30865.3	34789			5357	1496	889	781
	7653,4	16754.3	21961.3	28140.8			2090	1304	770	715
	7788,9	14923	21369.8	26588			2486	1325	860	869
	7628,6	15145.4	21189.2	27324.5			2562	1381	857	779
D+H + HA	9124.3	13670	19486.1	16185.3		D+H + HA	1473	949	101	403
	10820.3	13520	22079.4	16937.4			2181	1094	265	144
	9710.4	14574.5	24527.9	24186.9			2301	838	273	142
	7974.4	13354.9	34945.8	30895.2			2575	760	392	246
	7941.3	20267.9	25826.8	31512.8			2230	457	239	227
	7758.4	14021.1	27159.1	29998.7			2194	637	280	200
	6760,5	7890.4	22751.1	21814.8			1204	917	410	272
	6875,3	8929.1	20632.1	22328.8			1268	883	328	358
	6863,1	8555.7	16781.6	22369.3			1191	866	355	286
D64V	7276.2	12686.1	17554.1	16172.3		D64V	5678	495	104	169
	7975.2	10877.6	19423.2	9735.2			5682	630	118	154
	8486	10495.3	22130.3	10008.7			6166	712	113	173
	7058.5	6532.2	20514.2	24956.7			3894	562	54	37
	6558	6359.8	27610.6	32036.7			3647	499	74	24
	6509.9	7533.9	17513	28828.6			3168	413	55	24
	5029,4	6006.1	9663.7	16257.5			536	279	36	45
	5022,5	5932.7	8349.6	21243.3			434	258	67	27
	4996,2	5812.2	18720.6	18800.6			469	277	47	29
D64V+HA	6640.4	11397.4	12847.7	9124.9		D64V+HA	2112	215	138	90
	6433.3	10439.1	11909.6	16259.4			2364	240	135	90
	6740.3	9509.3	11946	14004.9			1974	172	80	99
	6005.3	6740.8	29425.3	26753.8			816	112	33	27
	5788.4	6236.8	26709.4	26007			899	131	36	21
	5626.3	7197.7	15222.8	25185.4			842	131	31	35
	5744,4	6175.3	10977.4	18734.7			437	127	23	8
	5495,5	6821.8	13456.5	15546.9			435	158	35	10
	5314,8	5513	15171	19613.6			500	161	45	18
NTD	5272.2	7947.3	8280.2	7930.6		NTD	9	12	61	146
	5319.3	6927.5	8786.3	7812.9			8	14	51	94
	6728.9	22197.9	9771.5	7248.4			11	7	46	82
	5531.3	6183.9	10005.6	13561.8			95	20	45	16
	6089.1	5358.7	9234.4	12126.7			45	42	78	38
	5161.5	5837.1	9257.6	13615.4			44	50	85	51
	6228,7	5983.8	9268.7	17636.6			37	100	37	32
	5942,6	4974.4	7476	13727.9			40	70	48	26
	4950,7	6112.7	6314.6	15203.3			25	71	31	8
