# Supplementary material for: Characterization of a new IN-I-PpoI fusion protein and a homology-arm containing transgene cassette that improve transgene expression persistence and 28S rRNA gene-targeted insertion of lentiviral vectors
Source: PLoS One. 2023 Jan 20;18(1):e0280894. doi: 10.1371/journal.pone.0280894 (PMC9858087; doi:10.1371/journal.pone.0280894)
Supplement: S3 Table — (XLSX) [file pone.0280894.s008.xlsx]

## Sheet: Table S3
Table S3. Analysis of targeted integration by droplet digital PCR from zeocin-selected CD3+ T lymphocytes on day 10 post-transduction.
	Copy number measurements								Calculation of integration targeting
		NHEJ integration							NHEJ events		HR events		Total targeted integration
	HR events	Sense	Antisense	Total	Vector copies	Production plasmid	Episomal vectors	Integrated vector copies	targ.-%		targ.-%		targ.-%
Sample	28S-HR	28Sint	Rev-28Sint	Sum28Sint	NHEJ	pLV	Episome	NHEJ-pLV-1-LTR+28S-HR	NHEJ Targ.%	0	HR Targ.%	0	Total Targ.%	0	SEM NHEJ	SEM HR	SEM Total
D64V	0	0	0	0	2.36281	0.0336149	0.677479	1.65172	0	0	0	0	0	0	0	0	0
	0	0	0	0	2.94296	0.102219	1.00807	1.83267	0		0		0
	0	0	0	0	3.51392	0.102908	0.884088	2.52693	0		0		0
	0	0	0	0	0.921983	0.0101836	0.350442	0.561358	0		0		0
	0	0	0	0	1.063	0.0277496	0.363426	0.671828	0		0		0
	0	0	0	0	0.997657	0.0206659	0.343433	0.633558	0		0		0
D64V+HR	0	0	0	0	1.71891	0.0651237	0.310474	1.34331	0	0	0	0	0	0	0	0	0
	0	0	0	0	1.54649	0.061173	0.249994	1.23532	0		0		0
	0	0	0	0	2.00252	0.0928443	0.424169	1.48551	0		0		0
	0	0	0	0	1.1297	0.0420772	0.230579	0.857047	0		0		0
	0	0	0	0	1.2235	0.0480167	0.228926	0.946556	0		0		0
	0	0	0	0	1.10933	0.0630873	0.253797	0.79245	0		0		0
INwt	0	0.00573272	0.00518472	0.0109174	9.29543	0.0470827	0.32709	8.92125	0.00122376	0.000860934	0	0	0.00122376	0.000860934	0.000154837	0	0
	0	0.00245825	0.00335483	0.00581308	10.5569	0.0312613	0.336599	10.189	0.000570525		0		0.000570525
	0	0.00690065	0.00587453	0.0127752	9.80491	0.0404038	0.417723	9.34679	0.0013668		0		0.0013668
	0	0.00243632	0	0.00243632	9.18272	0.0291177	0.357619	8.79598	0.000276981		0		0.000276981
	0	0.00222756	0.00329727	0.00552483	8.21354	0.0274978	0.353378	7.83267	0.000705358		0		0.000705358
	0	0.00639458	0.00301304	0.00940763	9.6356	0.0359081	0.396214	9.20348	0.00102218		0		0.00102218
INwt+HR	0.054672	0.00234469	0.00560932	0.00795401	7.07823	0.0286227	0.19263	6.91164	0.00115081	0.000638013	0.00791013	0.00761495	0.00906095	0.00825296	0.000109695	0	0.000516969
	0.0572369	0	0.00442858	0.00442858	6.29353	0.0225489	0.164846	6.16337	0.000718532		0.00928663		0.0100052
	0.0519611	0	0.00396543	0.00396543	6.56389	0.0123678	0.153835	6.44964	0.000614829		0.00805644		0.00867127
	0.0383457	0.00225665	0	0.00225665	6.58774	0.0183862	0.207927	6.39977	0.000352614		0.00599172		0.00634434
	0.0366523	0	0.00398406	0.00398406	6.45221	0.0200021	0.235928	6.23293	0.000639196		0.00588043		0.00651963
	0.0537147	0	0.00220829	0.00220829	6.4436	0.0152976	0.210102	6.27192	0.000352092		0.00856432		0.00891641
D+N	0	0	0	0	1.52788	0.0322647	0.158491	1.33713	0	0	0	0	0	0	0	0	0
	0	0	0	0	1.51158	0.0265913	0.199774	1.28521	0		0		0
	0	0	0	0	1.51859	0.0344363	0.159054	1.3251	0		0		0
	0	0	0	0	1.36887	0.0270054	0.163853	1.17801	0		0		0
	0	0	0	0	1.25172	0.0146317	0.117563	1.11952	0		0		0
	0	0	0	0	1.22532	0.0169513	0.101633	1.10674	0		0		0
D+N+HR	0.00761197	0	0	0	1.26475	0.0404007	0.03423	1.19773	0	0	0.00635531	0.00248339	0.00635531	0.00248339	0	0	0.00109899
	0	0	0	0	1.20234	0.0456648	0.0815661	1.0751	0		0		0
	0.0071366	0	0	0	1.35556	0.041042	0.0498283	1.27182	0		0.00561131		0.00561131
	0.00286947	0	0	0	1.02078	0.010401	0.0351493	0.978102	0		0.00293371		0.00293371
	0	0	0	0	1.13223	0.00927886	0.0107492	1.1122	0		0		0
	0	0	0	0	0.990767	0.0454919	0.0176678	0.927607	0		0		0
R+H	0	0	0	0	1.99217	0.170545	0.149516	1.67211	0	0	0	0	0	0	0	0	0
	0	0	0	0	2.24736	0.193042	0.177864	1.87646	0		0		0
	0	0	0	0	2.09437	0.149487	0.160721	1.78416	0		0		0
	0	0	0	0	1.16668	0.0822676	0.124336	0.960076	0		0		0
	0	0	0	0	1.21155	0.0747456	0.104879	1.03193	0		0		0
	0	0	0	0	1.17932	0.0737202	0.105539	1.00006	0		0		0
R+H+HR	0	0	0	0	2.00026	0.0393199	0.067642	1.8933	0	0	0	0.000641009	0	0.000641009	0	0	0.000585158
	0	0	0	0	1.60986	0.0319913	0.0521796	1.52569	0		0		0
	0	0	0	0	1.66459	0.0518975	0.0290365	1.58366	0		0		0
	0.00412103	0	0	0	1.17045	0.0343672	0.0687101	1.0715	0		0.00384605		0.00384605
	0	0	0	0	1.17694	0.0296071	0.0654538	1.08188	0		0		0
	0	0	0	0	1.00481	0.0468703	0.0709033	0.887033	0		0		0
D+H	0	0.0250026	0.0205697	0.0455723	2.67507	0.111916	0.591822	1.97134	0.0231175	0.0201891	0	0	0.0231175	0.0201891	0.00199433	0	0
	0	0.0198575	0.0182798	0.0381373	3.51353	0.156153	0.740769	2.61661	0.0145751		0		0.0145751
	0	0.0153093	0.0179593	0.0332685	3.30822	0.147042	0.701411	2.45977	0.0135251		0		0.0135251
	0	0.0110742	0.0111926	0.0222668	1.55186	0.035312	0.337831	1.17871	0.0188908		0		0.0188908
	0	0.0170083	0.0118673	0.0288756	1.54173	0.0364706	0.390526	1.11474	0.0259035		0		0.0259035
	0	0.0147901	0.0144472	0.0292373	1.5436	0.0430315	0.336792	1.16377	0.0251229		0		0.0251229
D+H+HR	0.0205678	0.0157294	0	0.0157294	2.79071	0.0637583	0.236014	2.5115	0.00626294	0.00716389	0.00818944	0.0148028	0.0144524	0.0219667	0.00100633	0	0.00476735
	0	0.00968333	0	0.00968333	2.29959	0.0316255	0.127656	2.14031	0.00452426		0		0.00452426
	0.0180412	0	0.0108048	0.0108048	2.08944	0.0247154	0.184712	1.89805	0.00569255		0.0095051		0.0151977
	0.0134628	0.00403429	0.00854785	0.0125821	1.27179	0.0124407	0.127606	1.1452	0.0109868		0.0117558		0.0227426
	0.0434271	0.00369823	0.00284129	0.00653952	1.22839	0.0242154	0.0349755	1.21263	0.00539285		0.0358124		0.0412052
	0.0244518	0.00650698	0.00400286	0.0105098	1.15818	0.00870907	0.135802	1.03812	0.0101239		0.0235539		0.0336779
	CN value set to 0 if <4 positive droplets per well. Each CN shown is average of two replicate measurements.
